# Supplementary material for: Pilus Adhesin RrgA Interacts with Complement Receptor 3, Thereby Affecting Macrophage Function and Systemic Pneumococcal Disease
Source: PubMed Central journal article supplement — mBio. 2012 Dec 26;4(1):e00535-12. doi: 10.1128/mBio.00535-12 (PMC3531807; doi:10.1128/mbio.00535-12), 2012-12-26
Supplement: mbo006121412so1.pdf [file mbo006121412so1.pdf]

## Supplemental Figure 1

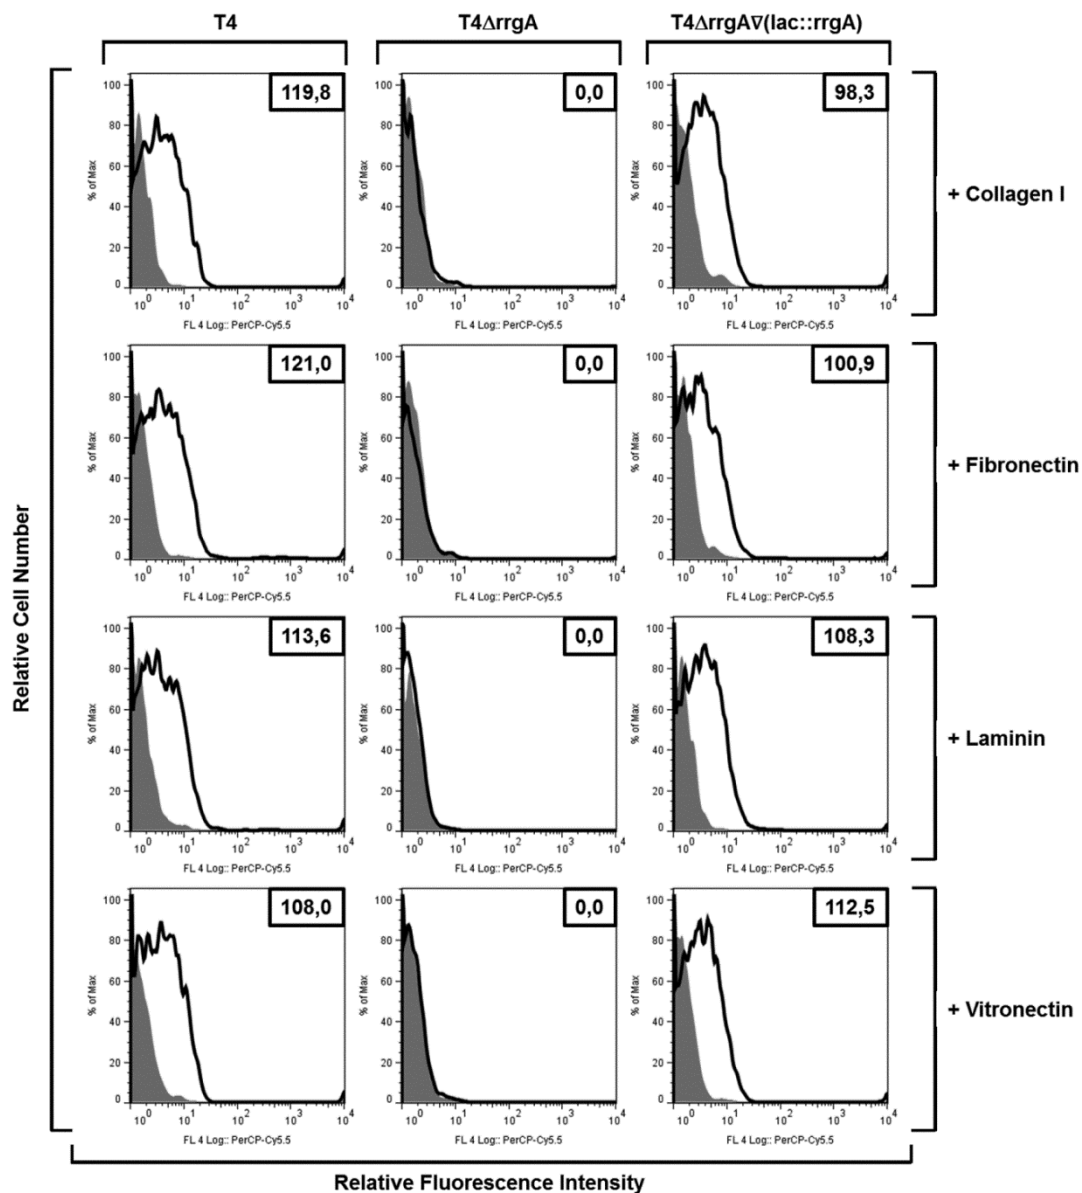

**Figure S1. CR3 binding to pneumococci expressing RrgA is not affected by the presence of extracellular matrix proteins (collagen I, fibronectin, laminin, or vitronectin).** Flow cytometry analysis of CR3 binding to RrgA protein associated to *S. pneumoniae* cell surface in presence of extracellular matrix proteins (EMPs). T4 strain and its mutants ( $10^8$  live bacteria) were incubated with 10  $\mu$ g/ml of indicated EMP and with (black lines histograms) or without (light gray filled histogram) 10 mg/ml of purified CR3. CR3 binding was detected with an anti-CD11b mAb (PerCp-Cy5.5 labeled) at 10  $\mu$ g/ml final concentration and is observed by a shift to the right in the population of bacteria incubated with the purified CR3 protein and expressing RrgA on their surface, i.e. T4 and T4 $\Delta$ rrgA $\nabla$ (lacE::rrgA), compared with cells incubated with PBS (control, filled grey) or with CR3 but not expressing RrgA, i.e. T4 $\Delta$ rrgA. Binding was calculated by subtracting the mean fluorescence intensity of bacteria incubated with purified CR3 protein plus indicated EMP from that of the bacteria incubated with the same indicated EMP and PBS ( $\Delta$ MFI). The average  $\Delta$ MFI values from three independent experiments are shown as numbers in the box close to each histograms overlay. Addition of EMPs (collagen I, fibronectin, laminin, or vitronectin) did neither inhibit nor enhance CR3 binding to pneumococcal cells expressing RrgA.
