# Supplementary material for: Pilus Adhesin RrgA Interacts with Complement Receptor 3, Thereby Affecting Macrophage Function and Systemic Pneumococcal Disease
Source: PubMed Central journal article supplement — mBio. 2012 Dec 26;4(1):e00535-12. doi: 10.1128/mBio.00535-12 (PMC3531807; doi:10.1128/mbio.00535-12), 2012-12-26
Supplement: mbo006121412so2.pdf [file mbo006121412so2.pdf]

## Supplemental Figure 2

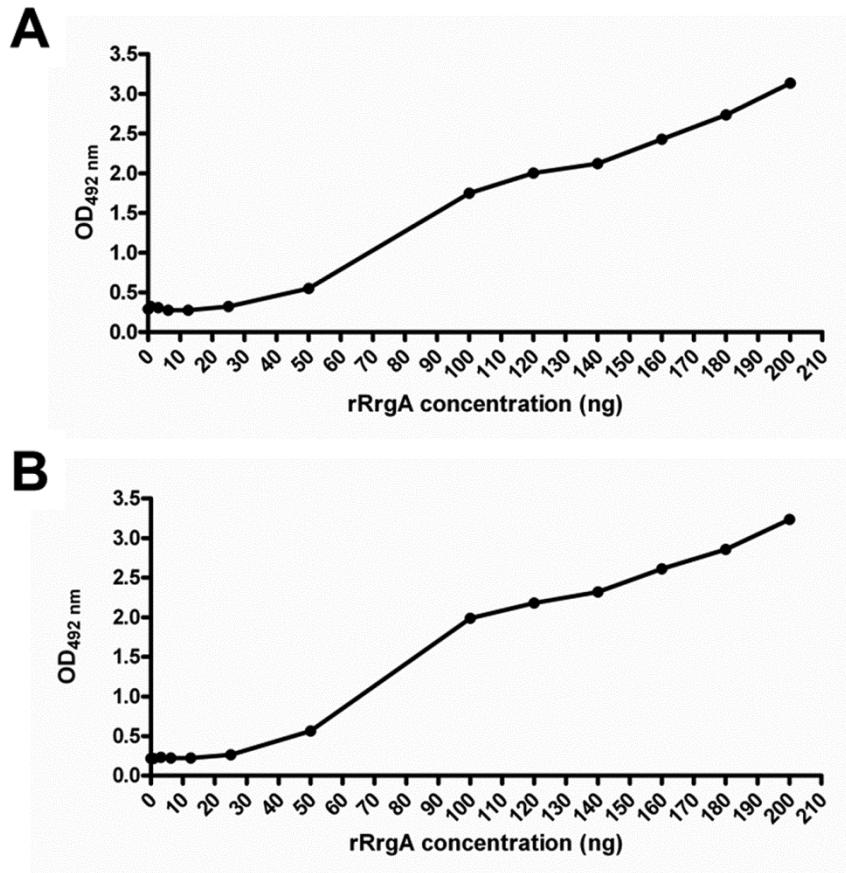

**Figure S2. The recombinant RrgA protein binds to purified human CR3 as well as to CD11b I domain-GST in a concentration-dependent manner.** In ELISA experiments, increasing amounts of recombinant RrgA were incubated with coated CR3 (A) or CD11b I domain-GST (B). Binding was detected by using a specific antibody against rRrgA (Rb- $\alpha$ RrgA) and an anti-rabbit IgG antibody HRP-conjugated. The rRrgA binding to CD11b (A) and to the CD11b I domain-GST (B) is dependent on the concentration of rRrgA.
