# Supplementary material for: Pilus Adhesin RrgA Interacts with Complement Receptor 3, Thereby Affecting Macrophage Function and Systemic Pneumococcal Disease
Source: PubMed Central journal article supplement — mBio. 2012 Dec 26;4(1):e00535-12. doi: 10.1128/mBio.00535-12 (PMC3531807; doi:10.1128/mbio.00535-12), 2012-12-26
Supplement: mbo006121412so3.pdf [file mbo006121412so3.pdf]

### Supplemental Figure 3

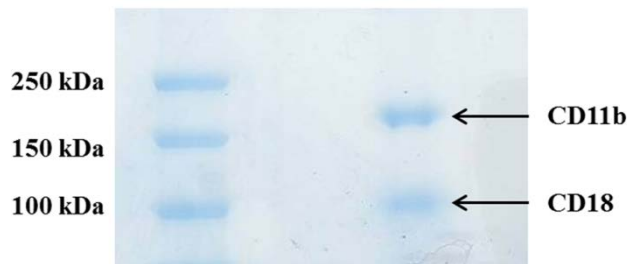

**Figure S3. Polyacrylamide gel of purified CR3 (CD11b/CD18 integrin).** Purified CR was run on 8% polyacrylamide gel in the presence of SDS and stained with Coomassie blue. The positions of the molecular-weight markers are indicated to the left, and the positions of CD11b and CD18 chains are indicated with arrows.
